1 Biological Sciences, Evolution

2 Early-exposure to new sex pheromone blend alters mate preference in  
3 female butterflies and in their offspring

4 Emilie Dion <sup>a,1</sup>, Li Xian Pui <sup>a</sup> and Antónia Monteiro <sup>a, b,1</sup>

5 <sup>a</sup> National University of Singapore, Department of Biological Sciences, 14 Science Drive 4, Singapore,  
6 117543

7 <sup>b</sup> Yale-NUS-College, 6 College Avenue East, Singapore 138614

8 <sup>1</sup> Correspondence to ED [dion.emilie@gmail.com](mailto:dion.emilie@gmail.com) and AM [antonia.monteiro@nus.edu.sg](mailto:antonia.monteiro@nus.edu.sg)

9

10 Keywords: sex pheromone evolution, learning, mate choice, butterflies, plasticity, trans-generational  
11 inheritance

12

13 **Abstract**

14 Insects use species-specific sex pheromone blends to attract members of the opposite sex who express  
15 the corresponding molecular receptors. Given this lock and key mechanism used for species identification  
16 and mate choice, it is currently not well understood how pheromone blends or receptor systems evolve.  
17 One possibility is that insects develop preferences for new sex pheromone blends via the process of  
18 learning, and that these learned preferences may be passed on to the next generation. We tested these  
19 hypotheses by exposing newly emerged *Bicyclus anynana* female butterflies to either wild type or to  
20 modified male sex pheromone blends. A few days later, we scored female mating outcome in a choice  
21 trial involving both male types. We also assessed the mating outcome of naïve offspring of females that  
22 underwent distinct odor learning trials to test for a potential inheritance of learned odor preferences.  
23 Naïve (parental) females mated preferentially with Wt-blend males, but females pre-exposed to new  
24 blends either shifted their preference to new-blend males, or mated equally with males of either blend  
25 type; the response depending on the new blend they were introduced to. Naïve daughters of females who  
26 were exposed to new-blend males behaved similarly to their experienced mothers. We demonstrate that  
27 females are able to learn preferences for novel pheromone blends in response to a short social  
28 experience, and pass that learned preference down to the next generation. This suggests that learning  
29 can be a key factor in the evolution of sex pheromone blend recognition and in chemosensory speciation.

30

31 **Significance statement**

32 While the diversity of sex pheromone communication systems across insects is well documented, the  
33 mechanisms that lead to such diversity are not well understood. Sex pheromones constitute a species-  
34 specific system of sexual communication that reinforces interspecific reproductive isolation. When odor  
35 blends evolve, the efficacy of male-female communication becomes compromised, unless preference for  
36 novel blends also evolves. We explore odor learning as a possible mechanism leading to changes in sex  
37 pheromone preferences. We show that preferences for new blends can develop following a short learning  
38 experience, and that these novel preferences can be transmitted to the next generation. To our  
39 knowledge, this is the first investigation of sex pheromone blend preference learning impacting mate  
40 choice and being inherited in an insect.

41

## 42 Introduction

43 The evolution of sexual communication via pheromones is a fascinating area of evolutionary biology  
44 because changes in pheromones or their perception may lead to assortative mating, reproductive  
45 isolation, and eventually speciation. In most insects, sex pheromones are critical to the process of finding  
46 and selecting a mate (1, 2). The composition and relative proportion of the sex pheromone blend  
47 components are typically species-specific, and, together with the corresponding specific reception  
48 molecules, play a fundamental role in interspecific reproductive isolation (3, 4). Recent studies in  
49 Lepidoptera, for instance, support a key role of this chemosensory system in speciation, where both male  
50 and female pheromone preferences have diversified along with the evolution of the respective blends (5-  
51 8). However, there is still very little understanding of the mechanisms originating divergence in mate  
52 preferences for new pheromone blends.

53 Learning to prefer a novel mate signal early in life could be a possible mechanism driving the evolution of  
54 new pheromone communication systems. Learned preferences for novel mate visual signals were  
55 previously shown in several arthropod species. In particular, early exposure to new ornamentations in  
56 spiders (9), fruit flies (10), or butterflies (11) all led to shifts in mate preferences in sexually mature older  
57 individuals. These premating experiences have thus been proposed to play a significant role in  
58 reproductive isolation (12, 13). Similar to visual signal learning, odor learning is known to happen routinely  
59 in an insect's life. For instance, honeybees learn pollen odors while foraging or after being exposed to  
60 pollen at an early age (14), and parasitoids learn the odors of their hosts when laying their eggs (15).  
61 Moths can also learn to associate a sex pheromone component with a food reward after a few proboscis  
62 extension conditioning trials (16). To date, however, there is no data on whether any insect can learn to  
63 prefer novel pheromone blends, via an early exposure, that results in a change in mating outcome.  
64 Learned pheromone preferences, over time, could eventually become genetically assimilated and fixed in  
65 a population, giving rise to populations of insects with novel pheromone blends and with specific  
66 sensitivity for those blends encoded at the genetic level.

67 A mechanism that could accelerate the process of genetic assimilation could be the transgenerational  
68 inheritance of acquired traits (17). Behavioral variations following an environmental experience have been  
69 hypothesized to be caused by epigenetic modifications that affect the expression of relevant genes, and  
70 which can be inherited through the germline (18). In particular, inheritance of learning and memory  
71 processes has already been shown in several species. Attraction of the nematode *Caenorhabditis elegans*

72 to olfactory signals after exposure to these cues was shown to be passed-down to their naïve offspring  
73 for several generations (19, 20). A more detailed molecular mechanism of learned odor avoidance was  
74 discovered in mice, where deterrence towards an odor was shown to be transmitted to the next  
75 generation via the inheritance of a hypomethylated form of the odor receptor gene expressed in the  
76 olfactory system (21). These examples illustrate how learning to avoid or prefer an odor might be  
77 transmitted by epigenetic marks to the offspring via the germ line. If epigenetic modifications, such as  
78 silencing marks, alter patterns of gene expression for a few generations, shielding these regions from  
79 natural selection, then genetic mutations are free to also accumulate in these same regions, eventually  
80 stabilizing the phenotype that was originally only environmentally induced.

81 In order to contribute to this field of research we tested whether female butterflies can shift their mate  
82 preferences after being exposed to males with novel sex pheromone blends, and whether learned  
83 preferences can be transmitted to the next generation. We performed these experiments on *Bicyclus*  
84 *anyana* butterflies, the only Lepidopteran in which mate preference learning has been shown to take  
85 place (11). In particular, females can learn preferences for novel male wing patterns in males if they are  
86 exposed to them for a short period after emergence (11). This learned preference, however, only happens  
87 if these males express the correct pheromone blend (22). Three male sex pheromones (MSP) have been  
88 identified in this species: (Z)-9-tetradecenol (MSP1), hexadecanal (MSP2) and R6, R10, R14-  
89 trimethylpentadecan-2-ol (MSP3). They are produced after emergence in specialized wing glands (23, 24).  
90 In *B. anyana* of the wet season form, females are the choosy sex (25, 26). Young virgin females frequently  
91 reject courting mates before reaching sexual maturity, being exposed to male sex pheromones during this  
92 process (23, 27). This particular life history, thus, lends the performance of pheromone learning  
93 experiments in this butterfly ecologically relevant.

94 To decide on the type of blend manipulations to do for this experiment we investigated how pheromone  
95 blends vary across closely related species. In insects, new sex pheromone blends may evolve in their  
96 composition by loss or gain of single components, or by variation in the ratios of components (28). A  
97 comparative MSP blend study across *Bicyclus* species showed that close relatives vary both quantitatively  
98 and qualitatively in their MSP blend. Sympatric pairs of species display larger differences in component  
99 amount and identity than allopatric pairs, suggesting that the MSP blend is involved in pre-mating  
100 reproductive isolation in this genus of butterfly (5). We decided, thus, to vary the amounts of blend  
101 components in our odor learning experiment in *B. anyana*.

102 Our experimental design and questions were as follows: We created two New Blends (NB) by either  
103 preventing the release of MSP2 and reducing the amounts of MSP1 and MSP3, thus creating a “reduced”  
104 blend (called NB1); and by increasing the amount of MSP2, producing an “enriched” blend (called NB2).  
105 We exposed immature females to males with these new blends and to males with the respective control  
106 manipulations (called Wt1 or Wt2), and observed the mating outcome of the same females in the  
107 presence of the two types of male a few days later (Fig. 1). We tested whether 1) new blend males are  
108 less attractive to naïve females; 2) females learn to prefer males with new blends and; 3) learned female  
109 preferences for one of the blends are transmitted to their offspring.

110

## 111 **Results**

### 112 **Male manipulations altered the levels of MSPs**

113 MSP2 was previously suggested to be the most relevant pheromone to female choice because males  
114 producing higher absolute or relative amounts of MSP2 had a higher mating success (29). By blocking the  
115 pheromone gland on the male hindwing or by perfuming the wing with MSP2, we created two novel  
116 blends, NB1 and NB2 respectively, that were different from Wt1 and Wt2 control blends (Fig. 1). In  
117 particular, MSP2 was absent in NB1 males, and was increased by 50 fold in NB2 males (30 minutes after  
118 perfuming) (Figs. 1b, 1c and S1). Total amounts of MSP1 and MSP3 were reduced by an average of 70%  
119 and 60% respectively in NB1 males, compared to Wt1 males (Fig. 1b).

### 120 **New blend males are not attractive to naïve females**

121 The innate sex pheromone preference of females without any social experience was monitored in a mate-  
122 choice assay, where the identity of the male (NB1 versus Wt1; or NB2 versus Wt2) that mated first with  
123 that female was scored. Naïve females showed an innate mating bias for the wild type blends in both  
124 experiments, with 77% and 70% of the tested females mating first with Wt1 and Wt2 males, respectively  
125 (Figs. 2a and 3).

### 126 **Premating exposure to novel MSP blends modified female innate mating bias.**

127 To test if female mating outcome changed after a short social experience, we exposed different females  
128 to either NB1, NB2, or to their corresponding control wild type males, and scored mating outcome in a  
129 mate choice assay a few days later. Because the males used for exposure and mate choice were from 4 to  
130 6 days old, we used mixed models to measure the effects of these variable along with the effect of  
131 exposure treatment on female mating outcome (see method section for full details). Female premating

132 exposure treatment significantly affected subsequent mating outcomes in both experiment 1 (MERL:  
133  $\chi^2=16.7$ , Df=4,  $p=2.2 \times 10^{-4}$ ) and experiment 2 (GLM,  $F=6.7$ , Df=2,  $p=1.8 \times 10^{-3}$ ). In particular, 90% of the females  
134 pre-exposed to Wt1-males mated with Wt1-males, showing a strong significant preference for the Wt1-  
135 blend, whereas females pre-exposed to NB1-males showed no mating bias, mating randomly with either  
136 male (only 51% mated with Wt1 males; Fig. 2a). These two mating outcomes were significantly different  
137 (Post-hoc tests from MERL, adjusted  $p=0.018$ ). In the “enriched blend” treatment (Fig. 3), NB2-exposed  
138 females mated predominantly with NB2-males (70%), while naïve females mated predominantly with  
139 Wt2-males (70%). These two mating outcomes were also significantly different (Post-hoc tests from GLM,  
140 adjusted  $p=0.001$ ). Females pre-exposed to Wt2-males showed no mating bias, 51% of them accepting  
141 the NB2-male first for mating.

#### 142 **Female offspring had similar preferences as their exposed mothers**

143 To test for inheritance of learned preferences, we submitted each naïve offspring of NB1-exposed and of  
144 Wt1-exposed females to mate choice trials with a single NB1 and a single Wt1 male. Note that the mothers  
145 of these female offspring, despite differences in early odor exposure, all mated with Wt males to control  
146 for this variable. Offspring of females exposed to Wt1 males mated preferentially with Wt1 males (72%;  
147 Pearson’s test:  $\chi^2=9.7$ ,  $p=0.003$ ), whereas offspring of females exposed to NB1 males did not show any  
148 mating bias, mating randomly with both male types (57% mated with Wt1-males; Pearson’s test:  $\chi^2=0.8$ ,  
149  $p=0.4$ ), as did their mothers (Fig. 2b). The percentage of matings with NB1 males was 15% higher in  
150 offspring of NB1-exposed females than in offspring of Wt1-exposed females (Fig. 2b). For a difference of  
151 this magnitude (i.e., effect size) to be significant across offspring types, the sample size would need to be  
152 increased to an average of 275 tested female offspring in each group (Table S2).

153 In all experiments, the age of males used for the pre-mating exposure, mating trial, and the position of  
154 the black dot placed on the wings to differentiate NB2 and Wt2 males (experiment 2) did not significantly  
155 affect mating outcome (Table S3).

## 156 **Discussion**

### 157 **Females learned to prefer a mutant pheromone blend**

158 Naïve females mated preferentially with males with a Wt blend over males with either of the mutant  
159 blends tested. These results demonstrate the ability of the olfactory circuitry to distinguish the different  
160 blends and confirm that the specific male sex pheromone composition and ratios of components are  
161 important for *B. anynana* mate selection (23, 27, 29). We demonstrate, however, that an early and brief

162 exposure of females to novel pheromone mutant blends alters their subsequent mating patterns. Initially  
163 unattractive males, lacking MSP2 and producing less MSP1 and MSP3, became as attractive as Wt males  
164 after a short early-exposure of females to their mutant blend. More strikingly, females mated  
165 preferentially with originally unattractive males with high amounts of MSP2, after they were exposed to  
166 this new blend. The changes in mating outcome are likely to have resulted from a change in female  
167 behavior rather than from alterations in male-male competition or male behavior during the mate choice  
168 trial due to the male's different odors. This is because the mate-choice experimental set-up with both  
169 males was identical in every treatment. In addition, the shift in the butterflies' mate preference was not  
170 influenced by mate-choice copying (30), as all females were isolated from each other and from the males  
171 since the pupal stage, and visually isolated from each other at every point in the experiment, including  
172 during mate choice trials. These results lead us to conclude that female preference for a male pheromone  
173 odor blend in *B. anynana* is not fixed but plastic, and influenced by early pheromone odor experiences.

174  
175 Female preference learning was stronger towards NB2 than NB1 blends. In particular, NB2-exposed  
176 females preferred NB2 over Wt2 males, but NB1-exposed females only lost their preference bias towards  
177 Wt1 males, mating randomly with either male type. Previous work showed that males with either higher  
178 absolute or relative levels of MSP2 to other MSP components had higher mating success. MSP2 was, thus,  
179 proposed as the most relevant MSP to female choice (29). Consequently, it might be harder for females  
180 to overcome the unattractiveness of NB1 compared to NB2 because NB1 is a highly divergent blend  
181 lacking MSP2, whereas NB2 has increased amounts and relative ratios of MSP2. The neurological  
182 mechanisms involved in this learning asymmetry, however, are still unclear.

183

#### 184 **Alterations of the chemosensory system may be responsible for the change in female blend preference**

185 Brief exposures to odors were previously shown to impact the expression of olfactory receptors, odorant  
186 binding proteins, and the development of brain olfactory centers in honeybees and moths (31-34). In the  
187 bee, qRT-PCR analysis revealed that 6 floral scent receptors were differentially expressed in the antenna  
188 depending on the scent environment they experienced (31). A brief one-minute exposure of male moths  
189 to female sex pheromones led to the up-regulation of a pheromone-binding protein in the male antennae,  
190 an enlargement of the antennal lobe, and an increase in the volume of the mushroom bodies in the male  
191 brain, which resulted in a higher sensitivity of the exposed males to the female blend (32-34). The brief  
192 exposure of *B. anynana* females to the new male pheromone blend may have led to similar changes in  
193 the female brain. The mechanisms in place, however, require future exploration.



194

195 **Learning to prefer a mutant blend male may have important evolutionary consequences**

196 Both empirical and theoretical studies have highlighted how the learning of a trait or a mate preference  
197 can impact assortative mating and population divergence (12, 35). Depending on the specific ecological  
198 conditions, type of trait, or learning process, models predict that mate preference learning can lead to  
199 reproductive isolation (*e.g.* (13, 36). Moth and butterfly sex pheromone blends are highly species-specific,  
200 ensuring the precise recognition of a compatible mate. These blends are generally thought to be under  
201 stabilizing selection because altered signals are less attractive and are thus selected against (28). However,  
202 the learning process that we describe here, by allowing males with divergent blends to reproduce, may  
203 mitigate the strength of stabilizing selection, and create opportunities for pheromone blends and  
204 reception systems to evolve. A recent study suggested that quantitative and qualitative variations  
205 observed in blends within and between natural *B. anynana* populations are potentially catalyzing ongoing  
206 speciation (6). The odor learning ability of *B. anynana* females has probably maintained the high variance  
207 in MSP amounts measured in different stock populations (23, 24, 29), as well as the variance in MSPs  
208 detected across natural populations (6). Furthermore, the use of multimodal signals in mate selection in  
209 *B. anynana*, where females use both olfactory and visual signals to assess mate quality (11, 22, 27), may  
210 facilitate pheromone learning and the evolution of the MSP blends. The presence of species-specific visual  
211 cues on the male wings likely increases a female's acceptance of odor-unattractive males from the same  
212 species, and decreases the risks of females learning new blends from hetero-specifics that could lead to  
213 hetero-specific mating. Thus, learning to prefer novel odors or odor blends may be a key starting point in  
214 the process of reproductive isolation and speciation, especially if this preference can be transmitted to  
215 the next generation via the germ line.

216

217 **Transgenerational inheritance of pheromone preferences may facilitate the evolution of assortative**  
218 **mating and speciation**

219 Naïve female offspring of mothers exposed to NB1 blends stopped avoiding NB1 blends, as did their naïve  
220 mothers, indicating that habituation towards this new blend was transgenerationally inherited. Daughters  
221 of females exposed to Wt-blend males, however, did not increase their preference for Wt-blend males.  
222 This lack of transmission of a more extreme preference for Wt blends in female offspring could be  
223 explained by an exhaustion of genetic variation, since exposure of females to wild type butterflies has  
224 been repeatedly done presumably since the origin of this species. Because all F1 individuals were kept

225 completely isolated from their conspecifics until mate choice, a change in F1 female preference is also not  
226 a result of social transmission, but more likely mediated via epigenetic mechanisms.

227

228 The transgenerational inheritance of acquired behaviors remains a controversial topic despite the growing  
229 number of empirical studies supporting it, including mechanistic studies. For instance, first- and second-  
230 generation naïve *Drosophila melanogaster* offspring displayed a preference toward the alcoholic odors  
231 their parent where trained to like. Disruption of the F0 olfactory receptors and specific neuron inputs into  
232 the mushroom bodies abolished the change in offspring response, identifying potential targets of  
233 epigenetic transmission (37). In addition, a number of studies have revealed that DNA methylation  
234 regulates memory formation and learning processes in insects (*e.g.* in bees (38, 39)) but have not  
235 investigated whether these marks can be inherited to the next generation. Inheritance of a differentially  
236 methylated odor receptor gene, however, was shown to take place in mice that learned to avoid a specific  
237 odor (21). We speculate that in our system, genes involved in odor perception and/or processing may  
238 have mediated the transmission of odor preferences to female offspring via yet unknown epigenetic  
239 mechanisms. A transmission of acquired pheromone odor preferences may favor assortative mating and  
240 chemosensory speciation.

241

## 242 **Conclusion**

243 We have demonstrated the learning, and the inheritance of new behavioral responses to new sex  
244 pheromone blends by female *B. anynana* butterflies, calling into question the belief that sexual chemical  
245 communication is under stabilizing selection. Over time, as new pheromone blends appear, and new  
246 learned sex pheromone preferences for those blends develop, new populations of insects may evolve with  
247 specific sensitivity for those blends encoded at the genetic level. Learning to prefer a new sex pheromone  
248 blend could be the starting point of the evolution of chemosensory communication, especially if the  
249 learned preferences can be inherited.

250

## 251 **Methods**

### 252 **Husbandry**

253 *Bicyclus anynana* is an African butterfly that produces alternative seasonal phenotypes in response to  
254 environmental cues (40). To avoid the seasonal variations in courtship behavior (26), eye size and UV light  
255 perception (41), and sex pheromone production (24), we performed all experiments with wet season

256 butterflies, all reared at 27°C, 80% humidity and 12:12h light:dark photoperiod. Larvae were fed young  
257 corn plants, and adults mashed banana. Sex was determined at the pupal stage, and females were placed  
258 in individual containers stored in a separated incubator, devoid of males or male sex pheromones until a  
259 male exposure or a mating trial. Upon emergence, males were put in age-specific cages. They were all  
260 naïve, virgin, aged from 4 to 6 days old during the experiment and had dorsal forewing eyespot UV-  
261 reflective pupils (as their absence in males is strongly selected against by females (25)). The two males  
262 presented to each female for a mating trial had the same age and similar wing size. The experimental  
263 procedure is described in Fig. 1.

#### 264 **Experiment 1: Prevention of MSP2 release from males**

265 Males were prepared following the method described in (27). The ventral hindwing androconia and yellow  
266 hair pencil were both coated with transparent non-viscous nail solution (Revlon Liquid Quick Dry). The  
267 hindwing dark hair patch, which overlaps the forewing androconia, was left uncoated. This treatment  
268 prevents the emission of MSP2 produced by hindwing glands only (23), and causes the reduction of MSP1  
269 and MSP3 total amounts by an average of 70% and 60% respectively (Fig. 1b) (24). The hindwing ventral  
270 side of Wild type (Wt1) males received the same treatment to control for the odor of the nail solution.  
271 Males were prepared ~16 hours prior to exposure or mate choice trials (Figs. 1a and 1b).

#### 272 **Experiment 2: Increase of MSP2 amount in males**

273 5µg of MSP2 (Cayman Chemical, n°9001996) diluted in 2µL of hexane were applied to each hindwing  
274 androconia of NB2 males. Wild type control males (Wt2) received the same volume of solvent only in the  
275 same wing location (Fig. 1c). This high load of synthetic hexadecanal was chosen to maximize the  
276 difference between MSP2 amounts of NB2 and Wt2 butterflies until several hours after application of the  
277 solution (Fig. S1). The evaporation rate of hexadecanal was determined by gas chromatography from 30  
278 minutes to 8 hours after perfuming. Between perfuming and MSP extraction, two males were placed  
279 together in one cylindrical hanging net cage, under identical temperature, humidity and light conditions  
280 than the ones used for the mate choice experiment (see “Mate choice assays” below and Supplementary  
281 procedure 1). Males were allowed to rest 30 minutes after perfuming until used for exposure or mate  
282 choice trials. At the end of this period, NB2 males had similar amounts of MSP2 and MSP3 on their wings  
283 (Fig. 1c).

#### 284 **Female exposure to New Blend or Wild type males**

285 The female butterfly was released in a cylindrical hanging net cage (30cm diameter, 40cm height) less  
286 than an hour after emergence (on day 0). The exposure was done manually by retaining the male between

287 the head and the thorax with narrow-tipped featherweight forceps for 3 minutes. The males were  
288 presented directly to the females in a similar way as the natural courtship behavior (same distance and  
289 orientation). In this position, male fluttering, the first step of the courtship sequence, helped the  
290 volatilization of the pheromones and could be encouraged by a gentle squeezing of the forceps (Fig. 1d).  
291 This procedure allowed a direct and controlled exposure of the females, and was non-harmful to the  
292 males. After exposure, the female remained isolated until day 2, when mate choice assays were conducted  
293 (Fig. 1a).

#### 294 **Mate choice assays**

295 All experiments were done at 24°C, 60% humidity, under UV and white light, in cylindrical hanging net  
296 cages. Mate choice of naïve and exposed females was started on day 2, around 9:30am (Fig. 1a). One Wt  
297 and one NB male were placed in the same cage along with the female. Female's abdomens were pre-  
298 dusted with fluorescent orange powder which is transmitted to the male upon copulation, allowing the  
299 identification of the mating partner. Males were checked for presence of powder every 2 hours to prevent  
300 multiple mating. Assays were ended after 8 hours after the beginning of the experiment. The latter time  
301 point corresponds to MSP2 amounts becoming similar between Wt2 and perfumed males (Fig. S1). To  
302 differentiate NB2 and Wt2 males, a black dot was applied with a sharpie pen randomly at the top or the  
303 bottom of their ventral hindwing. NB1 and Wt1 males were recognizable thanks to the light grey color of  
304 the nail solution covering the androconia or the corresponding area of the wing on the opposite side.

#### 305 **Testing the transgenerational inheritance of mate choice preferences**

306 An additional group of females were exposed to either NB1 or WT1 males, following the same exposure  
307 protocol as described above. We didn't test the preference of offspring of females that choose NB1 males,  
308 but instead, each female was mated with a single naïve Wt males in a separate cage. This procedure was  
309 followed to prevent possible confounding effects of the mate choice experiment and any predisposed  
310 genetic preferences that females may have. The male was removed after mating and the female given a  
311 corn plant for egg collection. Each female and its offspring (F1 individuals) constituted a family. F1 pupae  
312 were sexed, and the females were submitted to the exact same isolation procedure as naïve females until  
313 mate choice assays between a NB1 and a Wt1 male, tested on day 2 using identical procedures as  
314 described above (Fig. 1). Around 5 females were tested from the 13 Wt1 and the 11 NB1 families.

#### 315 **Statistical analyses**

316 Results from experiment 1, including offspring mate choice, and from experiment 2 were analyzed  
317 separately using R v. 3.2.4 (42) implemented in RStudio v.1.0.136 (43). P-values were obtained by

318 likelihood ratio tests of full regression models tested against simplified models with specific factors  
319 removed.

320 A Mixed Effect Logistic Regression (MELR) was used to analyze females and their offspring mate choice  
321 (experiment 1), as this model includes both fixed and random effects. *Female mate choice* was the  
322 binomial response (NB1 male chosen or not). The *family* identity was implemented as a random factor in  
323 the model. Each female from the parental generation, taken from our stock population cage, was  
324 considered as belonging to different families. The fixed factors included the female *treatment* (NB1-  
325 exposed females, offspring of NB1-exposed females, Wt1-exposed females, offspring of Wt1-exposed  
326 females, and naïve females) and the *age of males used for mate choice* (4, 5 or 6 days old). The analysis  
327 was followed by a pairwise comparison of the significant fixed effects using Tukey Contrasts. Because  
328 naïve females (including offspring) were not exposed, the effect of *male age during exposure* (4, 5 or 6  
329 days old) on female choice was analyzed separately with a binomial logistic regression. Packages lme4  
330 (44) and multcomp (45) were used.

331 The factors that contributed to *female mate choice* in experiment 2 were analyzed with a logistic  
332 regression, fitting a Generalized Linear Model (GLM) with quasi-binomial errors to control for over-  
333 dispersion, and a logit-link function. Fixed factors used in the model included *treatment* (NB2-exposed  
334 females, Wt2-exposed females and naïve females), *male age during exposure* and *male age for mate*  
335 *choice* (in both steps, they were 4, 5 or 6 days old), and the *position of the black mark* used to identify NB2  
336 and Wt2 males (the bottom or the top of the wing).

337 Finally, in both experiments, actual preference for the NB or the WT blend was tested using a Pearson's  
338  $\chi^2$  test in R. Blends were considered as preferred by females if mate choice differed significantly from  
339 random mating (50:50).

340

#### 341 **Acknowledgment**

342 We thank the National University of Singapore Environmental Research Institute and Frances Lim for the  
343 use of the GC-QQQ, Jeremy Pang and Tan Min for performing preliminary experiments, Dr. Erica  
344 Westerman and the butterfly lab members for their help and useful suggestions about the experiments  
345 and the manuscript. This work was funded by the Ministry of Education, Singapore grant MOE2014-T2-  
346 1-146.

## 347 References

- 348 1. Johansson BG & Jones TM (2007) The role of chemical communication in mate choice. *Biol. Rev.*  
349 82(2):265-289.
- 350 2. Gomez-Diaz C & Benton R (2013) The joy of sex pheromones. *EMBO reports* 14(10):874-883.
- 351 3. Smadja C & Butlin RK (2009) On the scent of speciation: the chemosensory system and its role in  
352 premating isolation. *Heredity (Edinb)* 102(1):77-97.
- 353 4. Cande J, Prud'homme B, & Gompel N (2013) Smells like evolution: the role of chemoreceptor  
354 evolution in behavioral change. *Curr. Opin. Neurobiol.* 23(1):152-158.
- 355 5. Bacquet PMB, Brattström O, Wang H-L, Allen CE, Löfstedt C, Brakefield PM, & Nieberding CM  
356 (2015) Selection on male sex pheromone composition contributes to butterfly reproductive  
357 isolation. *Proceedings of the Royal Society of London B: Biological Sciences* 282(1804).
- 358 6. Bacquet PMB, de Jong MA, Brattström O, Wang H-L, Molleman F, Heuskin S, Lognay G, Löfstedt  
359 C, Brakefield PM, Vanderpoorten A, & Nieberding CM (2016) Differentiation in putative male sex  
360 pheromone components across and within populations of the African butterfly *Bicyclus anynana*  
361 as a potential driver of reproductive isolation. *Ecology and Evolution* 6(17):6064-6084.
- 362 7. Groot AT, Dekker T, & Heckel DG (2016) The Genetic Basis of Pheromone Evolution in Moths.  
363 *Annu. Rev. Entomol.* 61:99-117.
- 364 8. Liénard MA & Löfstedt C (2016) Small Ermine moths. Role of pheromone in reproductive isolation  
365 and speciation. . *Pheromone communication in moths. Evolution, behavior and application.* , eds  
366 Allison JD & Cardé RT (University of California Press, Oakland), pp 211-224.
- 367 9. Hebets E (2003) Subadult experience influences adult mate choice in an arthropod: Exposed  
368 female wolf spiders prefer males of a familiar phenotype. *Proceedings of the National Academy*  
369 *of Sciences* 100(23):13390-13395.
- 370 10. Verzijden MN, Abbott JK, von Philipsborn AC, & Loeschcke V (2015) Male *Drosophila melanogaster*  
371 learn to prefer an arbitrary trait associated with female mating status. *Current Zoology*  
372 61(6):1036-1042.
- 373 11. Westerman EL, Hodgins-Davis A, Dinwiddie A, & Monteiro A (2012) Biased learning affects mate  
374 choice in a butterfly. *Proc Natl Acad Sci U S A* 109(27):10948-10953.
- 375 12. Verzijden MN, ten Cate C, Servedio MR, Kozak GM, Boughman JW, & Svensson EI (2012) The  
376 impact of learning on sexual selection and speciation. *Trends Ecol. Evol.* 27(9):511-519.
- 377 13. Gilman RT & Kozak GM (2015) Learning to speciate: The biased learning of mate preferences  
378 promotes adaptive radiation. *Evolution* 69(11):3004-3012.
- 379 14. Arenas A & Farina WM (2014) Bias to pollen odors is affected by early exposure and foraging  
380 experience. *J. Insect Physiol.* 66:28-36.
- 381 15. De Jong R & Kaiser L (1991) Odor learning by *Leptopilina boulardi*, a specialist parasitoid  
382 (Hymenoptera: Eucoilidae). *J. Insect Behav.* 4(6):743-750.
- 383 16. Hartlieb E, Hansson BS, & Anderson P (1999) Sex or Food? Appetitive Learning of Sex Odors in a  
384 Male Moth. *Naturwissenschaften* 86(8):396-399.
- 385 17. Klosin A & Lehner B (2016) Mechanisms, timescales and principles of trans-generational  
386 epigenetic inheritance in animals. *Curr. Opin. Genet. Dev.* 36:41-49.
- 387 18. Jensen P (2013) Transgenerational epigenetic effects on animal behaviour. *Progress in Biophysics*  
388 *and Molecular Biology* 113(3):447-454.
- 389 19. Remy JJ (2010) Stable inheritance of an acquired behavior in *Caenorhabditis elegans*. *Curr. Biol.*  
390 20(20):R877-R878.
- 391 20. Remy JJ & Hobert O (2005) An interneuronal chemoreceptor required for olfactory imprinting in  
392 *C. elegans*. *Science* 309(5735):787-790.



- 393 21. Dias BG & Ressler KJ (2014) Parental olfactory experience influences behavior and neural structure  
394 in subsequent generations. *Nat. Neurosci.* 17(1):89-96.
- 395 22. Westerman EL & Monteiro A (2013) Odour influences whether females learn to prefer or to avoid  
396 wing patterns of male butterflies. *Anim. Behav.* 86(6):1139-1145.
- 397 23. Nieberding CM, Vos Hd, Schneider MV, Lassance J-M, Estramil N, Andersson J, Bang J, Hednström  
398 E, Löfsted C, & Brakefield PM (2008) The male sex pheromone of the butterfly *Bicyclus anynana*:  
399 towards an evolutionary analysis *Plos ONE* 3(7):e2751.
- 400 24. Dion E, Monteiro A, & Yew JY (2016) Phenotypic plasticity in sex pheromone production in *Bicyclus*  
401 *anynana* butterflies. *Scientific Reports* 6:39002.
- 402 25. Robertson KA & Monteiro A (2005) Female *Bicyclus anynana* butterflies choose males on the basis  
403 of their dorsal UV-reflective eyespot pupils. *Proc. R. Soc. Lond. [Biol]*. 272(1572):1541-1546.
- 404 26. Prudic KL, Jeon C, Cao H, & Monteiro A (2011) Developmental plasticity in sexual roles of butterfly  
405 species drives mutual sexual ornamentation. *Science* 331(6013):73-75.
- 406 27. Costanzo K & Monteiro A (2007) The use of chemical and visual cues in female choice in the  
407 butterfly *Bicyclus anynana*. *Proc. R. Soc. Lond. [Biol]*. 274(1611):845-851.
- 408 28. Symonds MRE & Elgar MA (2008) The evolution of pheromone diversity. *Trends Ecol. Evol.*  
409 23(4):220-228.
- 410 29. Nieberding CM, Fischer K, Saastamoinen M, Allen CE, Wallin EA, Hedenstrom E, & Brakefield PM  
411 (2012) Cracking the olfactory code of a butterfly: the scent of ageing. *Ecol. Lett.* 15(5):415-424.
- 412 30. Dugatkin LA (1992) Sexual selection and imitation: females copy the mate choice of others *Am.*  
413 *Nat.* 139(6):1384-1389.
- 414 31. Claudianos C, Lim J, Young M, Yan S, Cristino AS, Newcomb RD, Gunasekaran N, & Reinhard J  
415 (2014) Odor memories regulate olfactory receptor expression in the sensory periphery. *Eur. J.*  
416 *Neurosci.* 39(10):1642-1654.
- 417 32. Anderson P, Hansson BS, Nilsson U, Han Q, Sjöholm M, Skals N, & Anton S (2007) Increased  
418 behavioral and neuronal sensitivity to sex pheromone after brief odor experience in a moth.  
419 *Chem. Senses* 32(5):483-491.
- 420 33. Guerrieri F, Gemeno C, Monsempes C, Anton S, Jacquín-Joly E, Lucas P, & Devaud J-M (2012)  
421 Experience-dependent modulation of antennal sensitivity and input to antennal lobes in male  
422 moths (*Spodoptera littoralis*) pre-exposed to sex pheromone. *The Journal of Experimental Biology*  
423 215(13):2334-2341.
- 424 34. Anton S, Chabaud M-A, Schmidt-Büsser D, Gadenne B, Iqbal J, Juchaux M, List O, Gaertner C, &  
425 Devaud J-M (2016) Brief sensory experience differentially affects the volume of olfactory brain  
426 centres in a moth. *Cell Tissue Res.* 364(1):59-65.
- 427 35. Servedio MR (2015) Advances on the interplay of learning and sexual selection. *Current Zoology*  
428 61(6):1004-1007.
- 429 36. Servedio MR & Dukas R (2013) Effects on population divergence of within-generational learning  
430 about prospective mates. *Evolution* 67(8):2363-2375.
- 431 37. Williams ZM (2016) Transgenerational influence of sensorimotor training on offspring behavior  
432 and its neural basis in *Drosophila*. *Neurobiol. Learn. Mem.* 131:166-175.
- 433 38. Biergans SD, Claudianos C, Reinhard J, & Galizia CG (2017) DNA methylation mediates neural  
434 processing after odor learning in the honeybee. *Scientific Reports* 7.
- 435 39. Biergans SD, Claudianos C, Reinhard J, & Galizia CG (2016) DNA methylation adjusts the specificity  
436 of memories depending on the learning context and promotes relearning in Honeybees. *Frontiers*  
437 *in Molecular Neuroscience* 9.
- 438 40. Brakefield PM & Reitsma N (1991) Phenotypic plasticity, seasonal climate and the population  
439 biology of *Bicyclus* butterflies (*Satyridae*) in Malawi. *Ecol. Entomol.* 16(3):291-303.

- 440 41. Everett A, Tong X, Briscoe A, & Monteiro A (2012) Phenotypic plasticity in opsin expression in a  
441 butterfly compound eye complements sex role reversal. *BMC Evol. Biol.* 12(1):1-12.
- 442 42. R Development Core Team (2008) R: A language and environment for statistical computing. ed  
443 Computing RFFS (ISBN 3-900051-07-0, Vienna, Austria).
- 444 43. RStudio Team (2016) RStudio: Integrated Development for R. <http://www.rstudio.com/>. ed Inc. R  
445 (Boston, MA).
- 446 44. Bates D, Mächler M, Bolker B, & Walker S (2015) Fitting Linear Mixed-Effects Models Using lme4.  
447 *Journal of Statistical Software* 67(1):48.
- 448 45. Hothorn T, Bretz F, & Westfall P (2008) Simultaneous inference in general parametric models.  
449 *Biometrical Journal* 50(3):346-363.
- 450 46. Faul F, Erdfelder E, Lang A-G, & Buchner A (2007) G\*Power 3: A flexible statistical power analysis  
451 program for the social, behavioral, and biomedical sciences. *Behavior Research Methods* 39:175-  
452 191.
- 453
- 454



455 **Figure Legends**

456 **Figure 1. Experimental procedure.** (a) The timeline of the experiment indicating when each step was  
457 performed. (b) Coating of the male androconia (NB1 males) prevented the release of MSP2 and reduced  
458 the total amount of MSP1 and MSP3 per male. (c) The average total amount of MSP2 per NB2 male, 30  
459 minutes after perfuming with synthetic hexadecanal, is increased compared to Wt2 males. In each graph,  
460 the horizontal line and the point in each box are the median and the mean amount, respectively. The 25th  
461 and 75th percentiles are contained within the outline of the boxes, and the horizontal lines above and  
462 below each box show the 1.5 times inter-quartile range of the data. 5 to 10 males were used to measure  
463 MSP amount in each treatment. (d) Schematics of the female exposure where the bottom panel illustrates  
464 the position of both male and female individuals from a top view.

465 **Figure 2. Mating outcome of females after exposure to the “reduced” (NB1) and wild type pheromone**  
466 **blends, and mating outcome of their naïve offspring.** (a) Mating outcomes shifted after females were  
467 exposure to a male with a reduced blend. Most naïve females, and females exposed to Wt1 blend mated  
468 with Wt1 males, but females exposed to NB1 males mated with these males at significantly higher rates  
469 than Wt1-exposed females. (b) Offspring of females exposed to Wt1 mated preferentially with Wt1 males,  
470 similarly to naïve and Wt1-exposed females from the parental generation. However, offspring of NB1-  
471 exposed females mated equally with either male type. Asterisks (\*  $p < 0.05$ ; \*\*  $p < 0.01$ ; \*\*\*  $p < 0.001$ ) indicate  
472 statistically significant preferences for the Wt1 blend using Pearson’s  $\chi^2$  test. The dotted line at 50%  
473 illustrates random mating. The horizontal bar above the plot shows a significant difference in mating  
474 outcome between the two treatments (from the Tukey post-hoc test, adjusted p value is indicated). The  
475 “n” on each bar indicates the total number of female tested. Post-hoc test results providing adjusted p  
476 values comparing the different treatments are shown in Table S1a.

477 **Figure 3. Mating outcome of females after exposure to the “enriched” (NB2) and wild type pheromone**  
478 **blends.** In experiment 2, females shifted their mating outcome after exposure to a Wt2 male or a male  
479 perfumed with a novel pheromone blend containing more MSP2. Most naïve females mated with Wt2  
480 males, females exposed to the Wt2 blend mated equally with both male types, and females exposed to  
481 the new blend mated with new blend males at significantly higher rates than naïve females. The dotted  
482 line at 50% illustrates random mating. Asterisks (\*  $p < 0.05$ ; \*\*  $p < 0.01$ ) represent non-random mating  
483 outcomes using Pearson’s  $\chi^2$  test. The horizontal bar above the plot shows a significant difference in  
484 mating outcome between the two designated treatments (from the Tukey post-hoc test, adjusted p value

485 is indicated). The “n” on top of each bar indicates the total number of female tested. Post-hoc test results  
486 providing adjusted p values comparing the different treatments are shown in Table S1b.

487

488 **Figure 1.**

(a)

| TIMELINE                  | Day -1                                                     | Day 0                                                                                     | Day 1                                                         | Day 2                                                                      | Every day                  |
|---------------------------|------------------------------------------------------------|-------------------------------------------------------------------------------------------|---------------------------------------------------------------|----------------------------------------------------------------------------|----------------------------|
| <b>EXPERIMENTAL STEPS</b> | Preparation of Wt1 and NB1 males for exposure the next day | Female emergence and exposure<br>Perfuming of Wt2 and NB2 males for exposure the same day | Preparation of Wt1 and NB1 males for mate choice the next day | Mate choice<br>Perfuming of Wt2 and NB2 males for mate choice the same day | Isolation of emerged males |

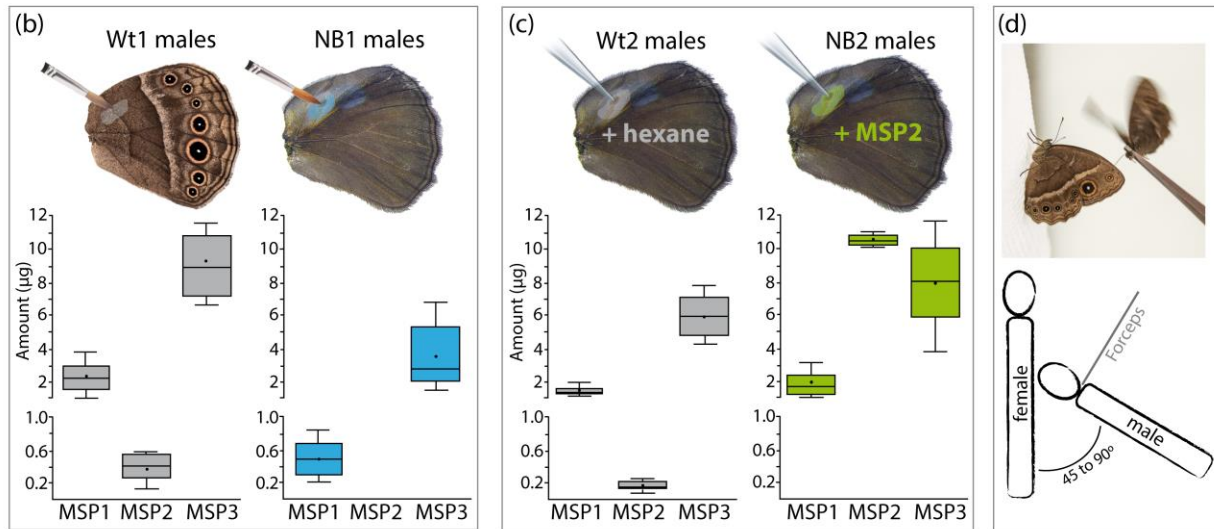

489

490

491 **Figure 2.**

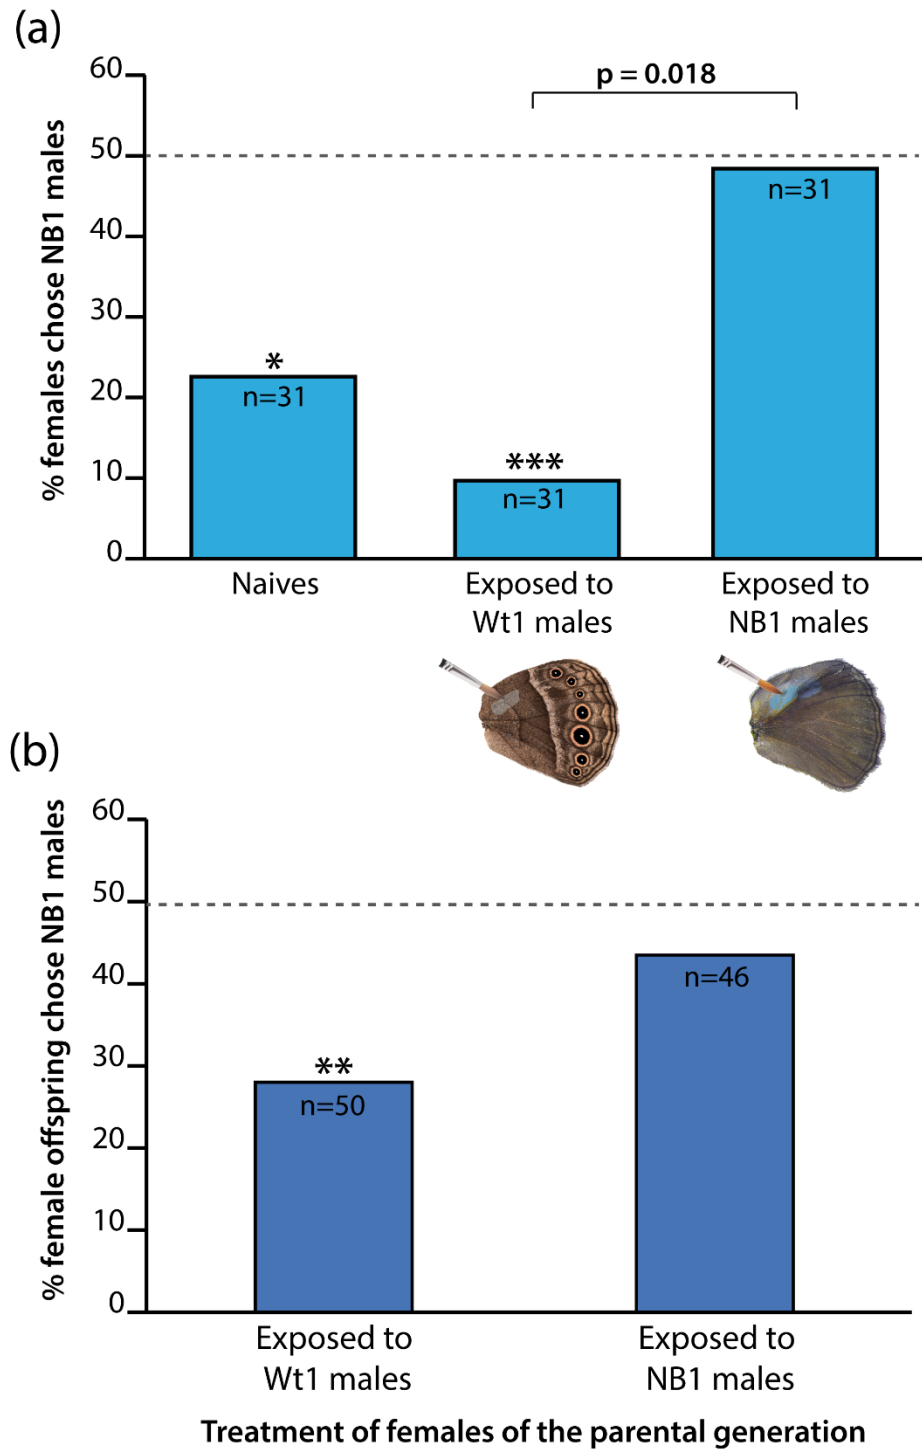

492

493

494 **Figure 3.**

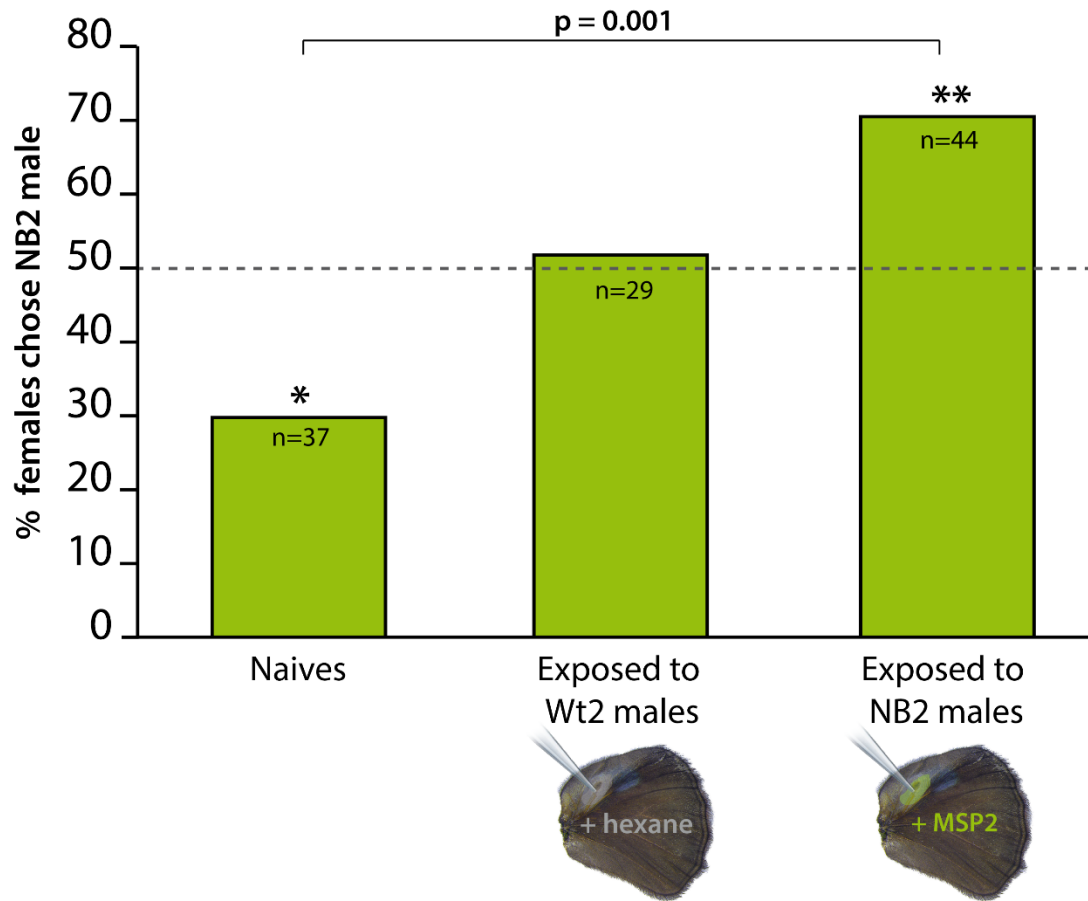

495

496
